# Supplementary material
Source: PubMed Central journal article supplement (PMC9851997)
Supplement: NIHMS1838947-supplement-Supplemental_Publication_Material.pdf [file NIHMS1838947-supplement-Supplemental_Publication_Material.pdf]

## Supplemental Material

### Gut microbiota-generated phenylacetylglutamine and heart failure

Kymberleigh A. Romano PhD<sup>1</sup>, Ina Nemet PhD<sup>1</sup>, Prasenjit Prasad Saha PhD<sup>1</sup>, Arash Haghikia MD<sup>2,3,4</sup>, Xinmin S. Li PhD<sup>1</sup>, Maradumane L. Mohan PhD<sup>1</sup>, Beth Lovano BS<sup>1</sup>, Laurie Castel BS<sup>1</sup>, Marco Witkowski MD<sup>1</sup>, Jennifer A. Buffa MS<sup>1</sup>, Yu Sun PhD<sup>1</sup>, Lin Li PhD<sup>1</sup>, Christopher M. Menge BS<sup>1</sup>, Ilja Demuth PhD<sup>5,6</sup>, Maximilian König MD<sup>5</sup>, Elisabeth Steinhagen-Thiessen MD<sup>5</sup>, Joseph A. DiDonato PhD<sup>1</sup>, Arjun Deb MD<sup>7</sup>, Fredrik Bäckhed PhD<sup>8</sup>, W.H. Wilson Tang MD<sup>1,9</sup>, Sathyamangla Venkata Naga Prasad PhD<sup>1</sup>, Ulf Landmesser MD<sup>2,3,4</sup>, David R. Van Wagoner PhD<sup>1</sup>, Stanley L. Hazen MD PhD<sup>1,9</sup>

<sup>1</sup> Department of Cardiovascular & Metabolic Sciences, Lerner Research Institute, Cleveland Clinic, Cleveland, OH, USA

<sup>2</sup> Department of Cardiology, Charité-Universitätsmedizin Berlin, Campus Benjamin Franklin, Berlin, Germany

<sup>3</sup> German Center for Cardiovascular Research (DZHK), Partner Site Berlin, Berlin, Germany

<sup>4</sup> Berlin Institute of Health (BIH), Berlin, Germany

<sup>5</sup> Department of Endocrinology and Metabolism, Charité-Universitätsmedizin Berlin, Charitéplatz, Berlin, Germany

<sup>6</sup> Berlin Institute of Health Center for Regenerative Therapies, Berlin, Germany

<sup>7</sup> Division of Cardiology and Department of Medicine, David Geffen School of Medicine, UCLA, Los Angeles, California, USA.

<sup>8</sup> Department of Molecular and Clinical Medicine, Wallenberg Laboratory, Institute of Medicine, University of Gothenburg, Gothenburg, Sweden.

<sup>9</sup> Heart, Vascular and Thoracic Institute, Cleveland Clinic, Cleveland, OH, USA

Lead contact: Stanley Hazen, 9500 Euclid Ave, mail code NC-10, Cleveland Clinic, Cleveland, OH, USA 44195

Tel: +1 216 445 9763. Fax: +1 216 444 9404.

Email: hazens@ccf.org

**Supplemental Table 1:** Baseline characteristics of heart failure (HF) patients in the US and European cohorts

| Characteristics                  | HF patients in the US Cohort (n=712) | HF patients in the European Cohort (n=553) |
|----------------------------------|--------------------------------------|--------------------------------------------|
| Age, mean $\pm$ SD, years        | 66.1 $\pm$ 10.5                      | 76.1 $\pm$ 9.5                             |
| Male sex, n (%)                  | 421 (59.1)                           | 412 (74.3)                                 |
| Current smoking, n (%)           | 81 (11.4)                            | 69 (12.5)                                  |
| Systolic blood pressure, mm Hg   | 130.0 (116.0-145.0)                  | N/A                                        |
| Diastolic blood pressure, mm Hg  | 71.0 (63.0-80.0)                     | N/A                                        |
| BMI, kg/cm <sup>2</sup>          | 28.1 (25.1-32.9)                     | N/A                                        |
| Hypertension, n (%)              | 537 (76.8)                           | 460 (83.2)                                 |
| Diabetes, n (%)                  | 287 (40.3)                           | 174 (31.5)                                 |
| CAD, n (%)                       | 585 (82.2)                           | 460 (83.6)                                 |
| HDL, mg/dL                       | 31.7 (26.0-39.7)                     | 47.0 (39.0-58.0)                           |
| LDL, mg/dL                       | 91.0 (72.8-112.0)                    | 87.0 (66.0-114.0)                          |
| TG, mg/dL                        | 118.5 (87.0-165.0)                   | 117.0 (89.0-167.0)                         |
| hs-CRP, mg/L                     | 3.90 (1.57-9.01)                     | 2.1 (0.8-5.6)                              |
| LVEF, %                          | 40.0 (25.0-55.0)                     | 56.0 (48.0-63.0)                           |
| NT-proBNP, pg/mL                 | 895.0 (348.8-2040.2)                 | 501.0 (173.0-1421.0)                       |
| eGFR, mL/min/1.73 m <sup>2</sup> | 79.8 (61.5-94.3)                     | 69.0 (56.8-85.6)                           |

The cohorts are comprised of sequential stable subjects without evidence of acute coronary syndrome (cardiac troponin I < 0.03 ng/mL) who underwent elective diagnostic coronary angiography (cardiac catheterization or coronary computed tomography) for evaluation of coronary artery disease (CAD).

Continuous data are presented as median (interquartile range or 25<sup>th</sup> percentile - 75<sup>th</sup> percentile), categorical variables are presented as %; N/A = not available; BMI = body mass index; HDL = high-density lipoprotein; LDL = low-density lipoprotein; TG = triglyceride; hs-CRP = high-sensitivity C-reactive protein; LVEF = left ventricular ejection fraction; NT-proBNP = N-terminal pro B-type natriuretic peptide; eGFR = estimated glomerular filtration rate.

The Wilcoxon–rank sum test or Welch two sample t-test for continuous variables and the  $\chi^2$  test for categorical variables were used to determine significant difference between groups.

Estimated glomerular filtration rate (eGFR) (mL/min per 1.73 m<sup>2</sup>) is calculated on the basis of the Chronic Kidney Disease Epidemiology Collaboration 2021 CKD-EPI Creatinine equation<sup>15</sup>.

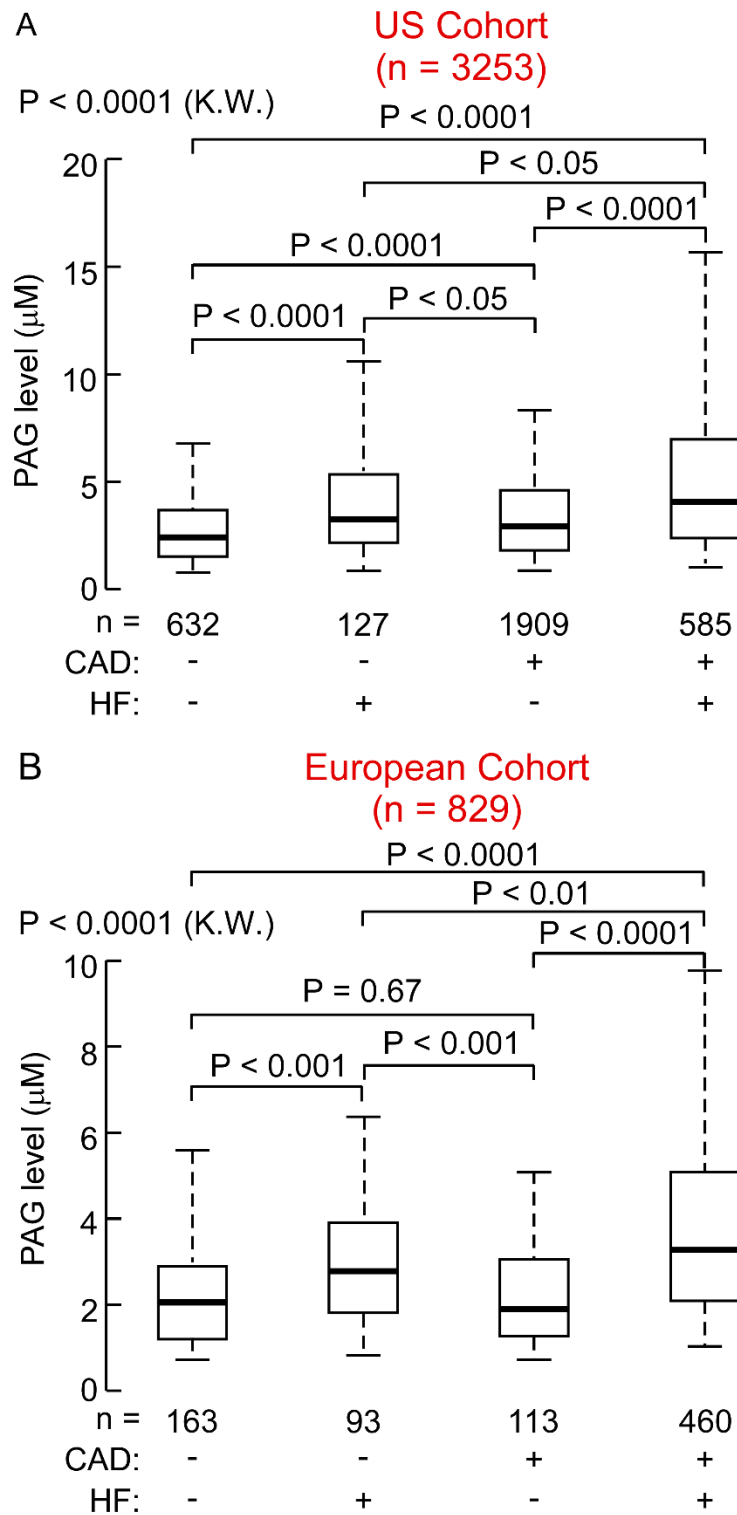

**Fig. S1. The association of PAGIn with heart failure.** Box whisker plot of circulating PAGIn levels in **(A)** US Cohort subjects or **(B)** European cohort subjects stratified by

coronary artery disease (CAD) and heart failure (HF) status. Data are represented as boxplots: middle line is the median, the lower and upper hinges are the first and third quartiles, the whiskers represent 10<sup>th</sup> and 90<sup>th</sup> percentile; P values were calculated using Kruskal Walls (K.W.) with Dunn's test.

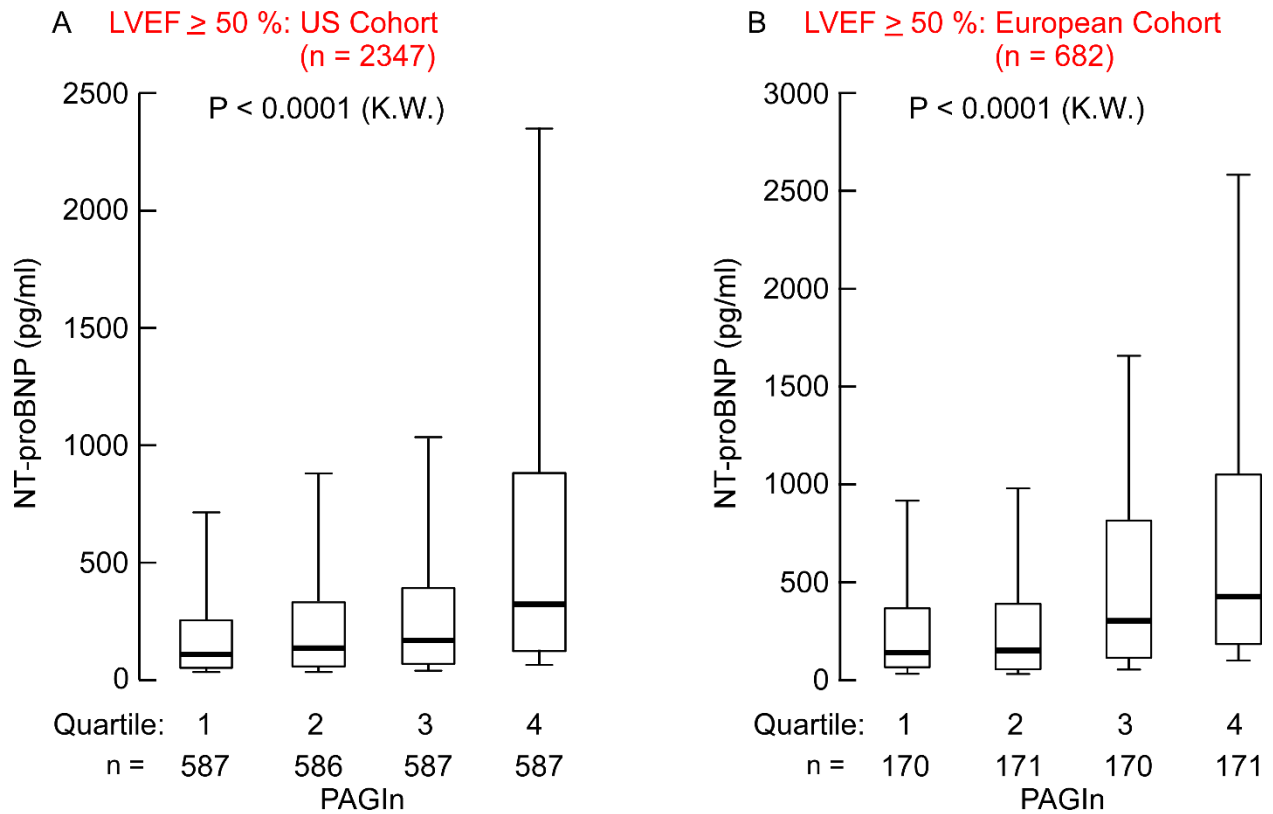

**Fig. S2. PAGIn is associated with NT-proBNP in individuals with preserved left ventricular systolic function.**

Circulating NT-proBNP levels (pg/ml) among those with preserved left ventricle systolic ejection fraction (LVEF  $\geq$  50%) within **(A)** US Cohort; and **(B)** European Cohort stratified by PAGIn quartiles. Data are represented as boxplots: middle line is the median, the lower and upper boundaries to the boxes represent 25<sup>th</sup> and 75<sup>th</sup> percentiles, and the whiskers represent 10<sup>th</sup> and 90<sup>th</sup> percentile; P values were calculated using Kruskal-Wallis (K.W.) test.

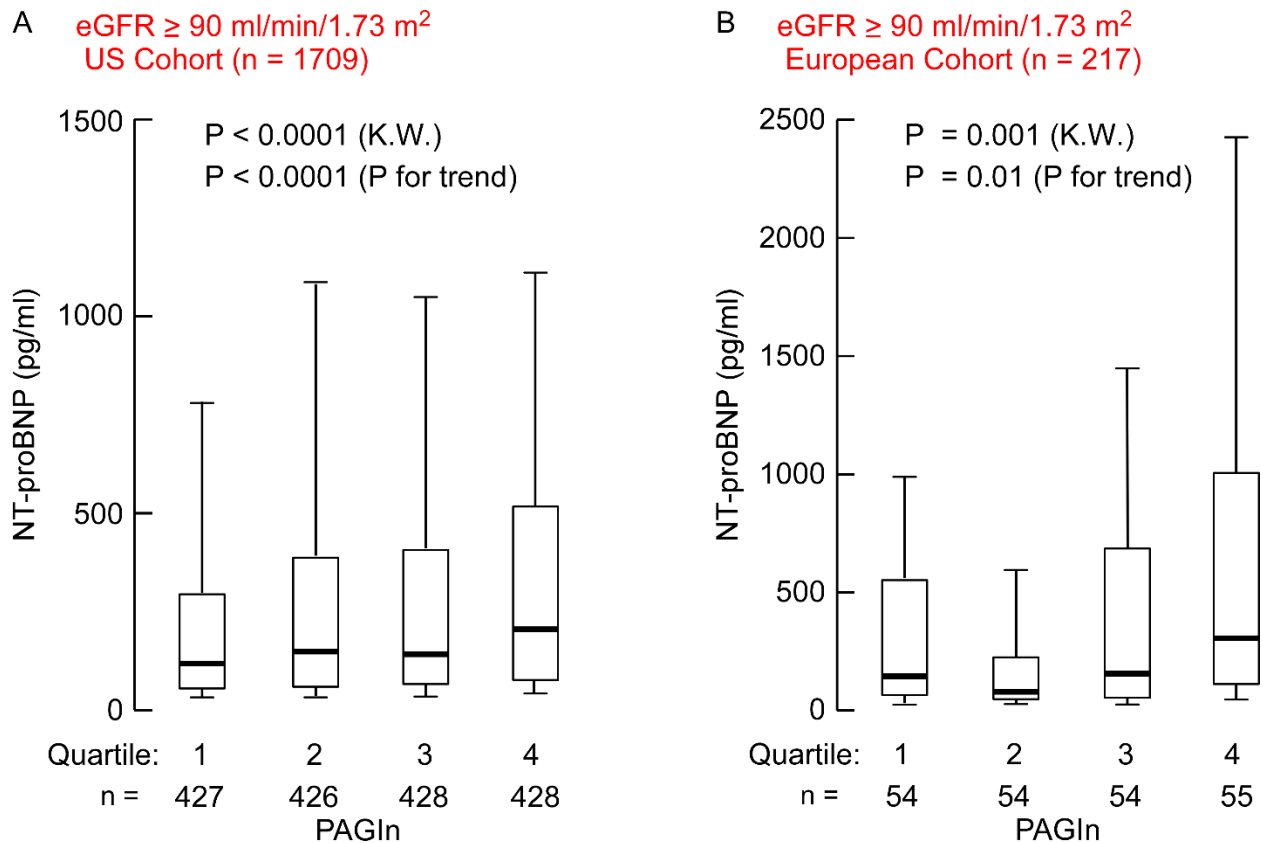

**Fig. S3. PAGln is associated with NTpro-BNP in individuals with preserved kidney function.**

Circulating NTpro-BNP levels (pg/ml) in (A) US Cohort or (B) European Cohort stratified by PAGln quartiles amongst those with normal renal function (eGFR $\geq$ 90 mL/min/1.73 m<sup>2</sup>). Data are represented as boxplots: middle line is the median, the lower and upper boundaries to the boxes represent 25<sup>th</sup> and 75<sup>th</sup> percentiles, and the whiskers represent 10<sup>th</sup> and 90<sup>th</sup> percentile; P values were calculated using Kruskal-Wallis (K.W.) test, and the Jonckheere –Terpstra test of trend.

**A US Cohort (n = 3256)**

**Heart Failure**

PAGIn (range,  $\mu\text{M}$ )

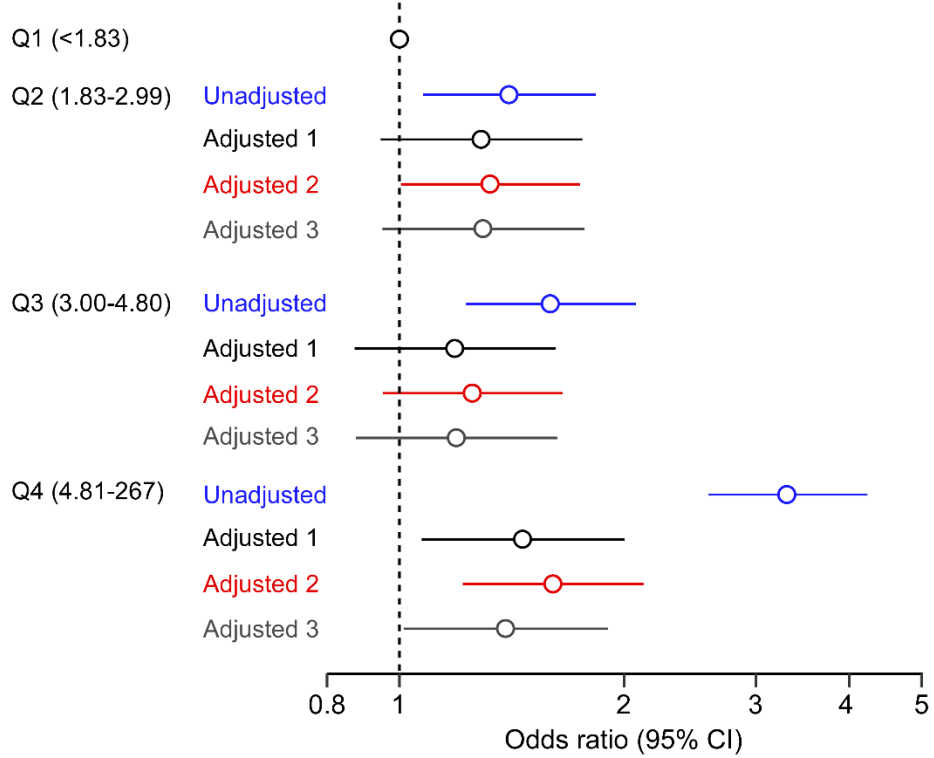

**B European Cohort (n = 829)**

**Heart Failure**

PAGIn (range,  $\mu\text{M}$ )

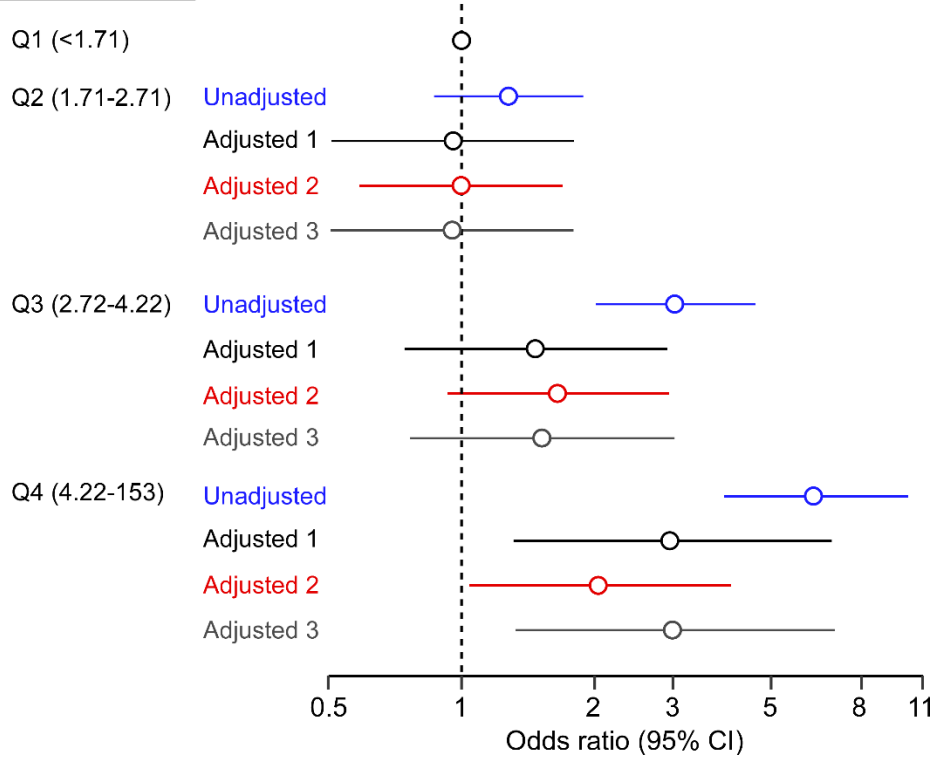

**Figure S4. The association of PAGIn with heart failure.**

**(A/B)** Risk of HF among all test subjects according to PAGIn quartile levels using a multivariable logistic regression models. Unadjusted odd ratio (blue), Adjusted Model 1 (age, sex, smoking status, SBP, LDL, HDL, TG, hs-CRP, diabetes and obesity (BMI $\geq$ 30 kg/m<sup>2</sup>), indices of renal function (eGFR $\geq$ 60, or <60 mL/min per 1.73 m<sup>2</sup>) and LVEF, black); Adjusted Model 2 (age, sex, smoking status, SBP, LDL, HDL, TG, hs-CRP, diabetes and obesity (BMI $\geq$ 30 kg/m<sup>2</sup>), indices of renal function (eGFR $\geq$ 60, or <60 mL/min per 1.73 m<sup>2</sup>) and NT-proBNP, red); and Adjusted Model 3 (Model 2 + LVEF) . Symbols represent odds ratios, and the 5%–95% confidence intervals (CI) are indicated by the line length.
